# Supplementary material for: A comparison of sleep-wake patterns among school-age children and adolescents in Hong Kong before and during the COVID-19 pandemic
Source: bioRxiv or medRxiv preprint supplement (doi:10.1101/2022.06.01.22275778), 2022-06-02
Supplement: Supplementary file [file media-1.pdf]

Supplementary Table 1: Month-by-month recruitment number

| Month        | Year | SEC        | PRI        |
|--------------|------|------------|------------|
| 9            | 2019 | 64         | 34         |
| 10           | 2019 | 26         | 3          |
| 11           | 2019 | 62         | 28         |
| 12           | 2019 | 42         | 63         |
| 1            | 2020 | 36         | 118        |
| 2            | 2020 | 0          | 1          |
| 3            | 2020 | 1          | 22         |
| 4            | 2020 | 6          | 11         |
| 5            | 2020 | 9          | 5          |
| 6            | 2020 | 14         | 8          |
| 7            | 2020 | 8          | 32         |
| 8            | 2020 | 3          | 35         |
| 9            | 2020 | 0          | 35         |
| 10           | 2020 | 0          | 26         |
| 11           | 2020 | 11         | 84         |
| 12           | 2020 | 42         | 104        |
| 1            | 2021 | 69         | 63         |
| 2            | 2021 | 7          | 31         |
| 3            | 2021 | 16         | 34         |
| 4            | 2021 | 18         | 12         |
| 5            | 2021 | 8          | 43         |
| 6            | 2021 | 2          | 1          |
| <b>Total</b> |      | <b>444</b> | <b>793</b> |
